# Supplementary material for: Differential Management of the Replication Terminus Regions of the Two Vibrio cholerae Chromosomes during Cell Division
Source: PubMed Central journal article supplement (PMC4177673; doi:10.1371/journal.pgen.1004557), 2014-09-25
Supplement: pgen.1004557.s004.pdf [file pgen.1004557.s004.pdf]

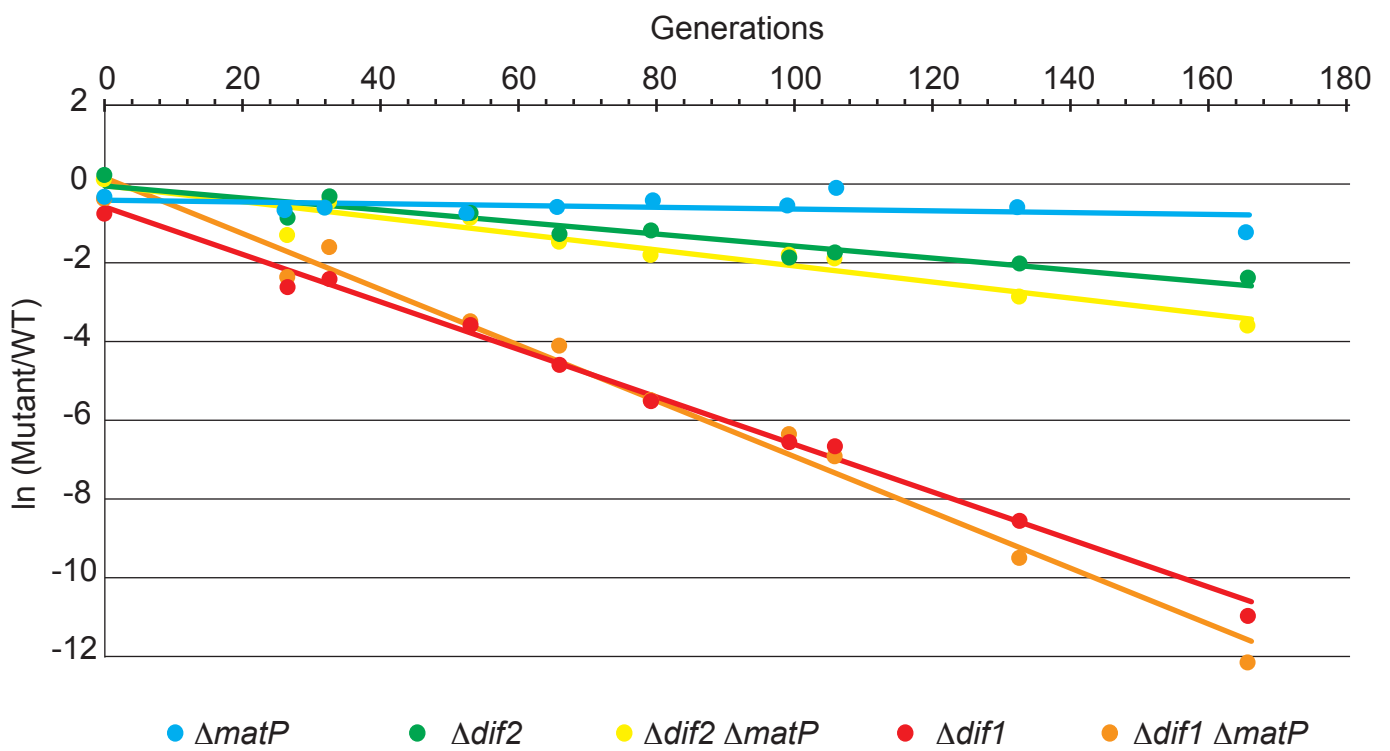

Supplementary figure 4
